# Supplementary material
Source: ML conference proceedings conference paper supplement (https://openreview.net/forum?id=JhCcUMFEq7)
Supplement: supplementary_material [file attachment]

---

# Supplementary Material for Neural View Synthesis and Matching for Semi-Supervised Few-Shot Learning of 3D Pose

---

## 1 Anchor Images for Semi-Supervised Learning

- 2 For each category we manual pick 7 images under variant viewpoint for the 7 annotated image  
3 settings. Here we show all the images we manually picked.

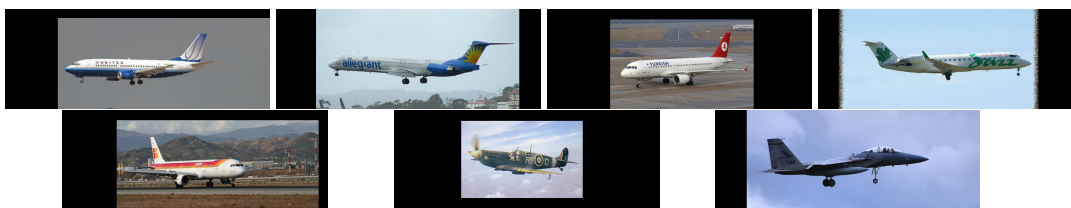

Figure 1: Anchor Images for Aeroplane Category in PASCAL3D+ dataset.

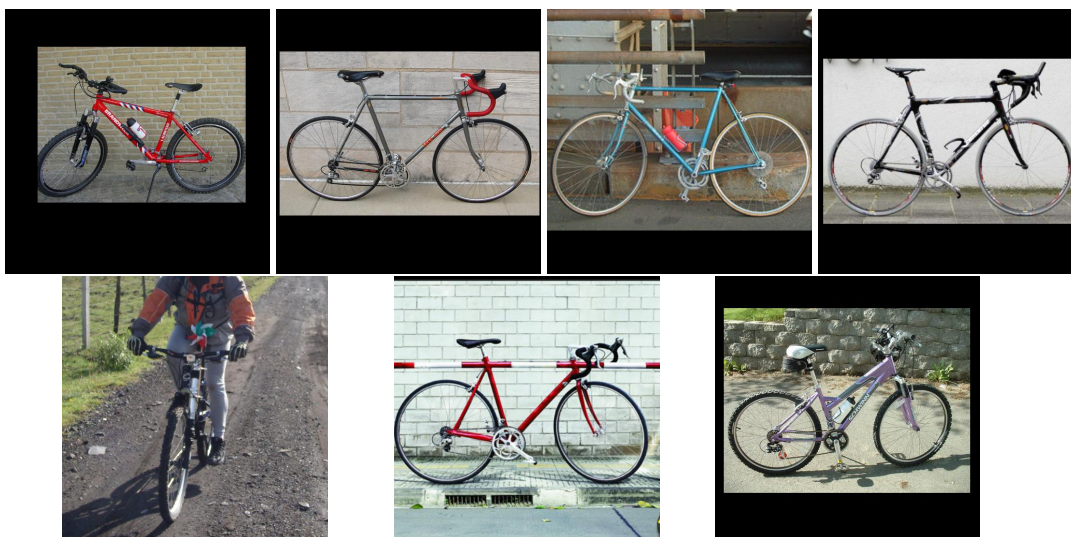

Figure 2: Anchor Images for Bicycle Category in PASCAL3D+ dataset.

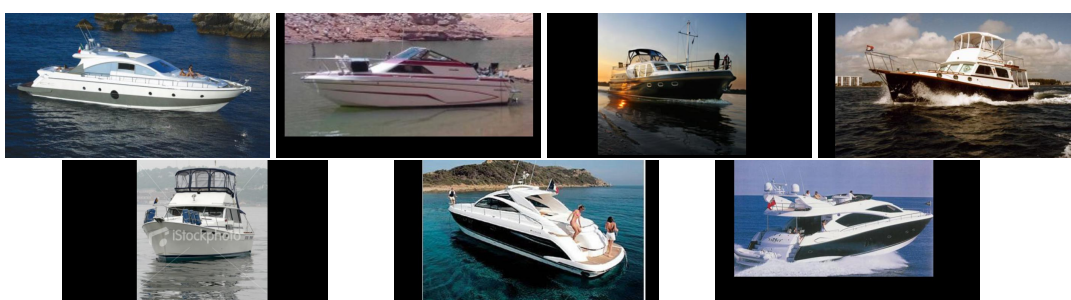

Figure 3: Anchor Images for Boat Category in PASCAL3D+ dataset.

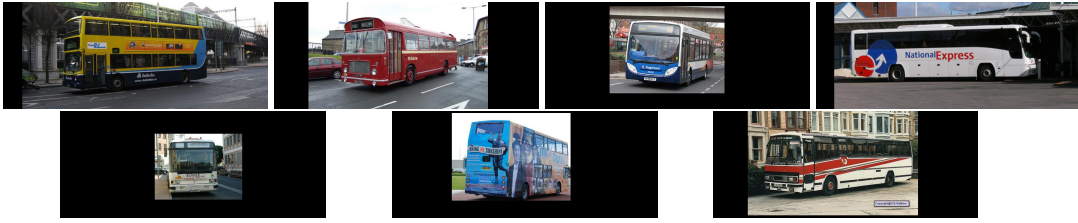

Figure 4: Anchor Images for Bus Category in PASCAL3D+ dataset.

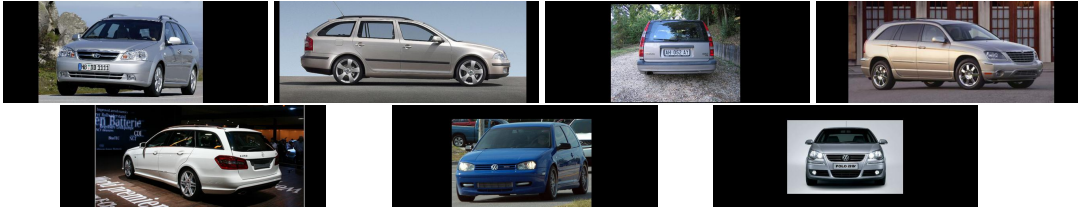

Figure 5: Anchor Images for Car Category in PASCAL3D+ dataset.

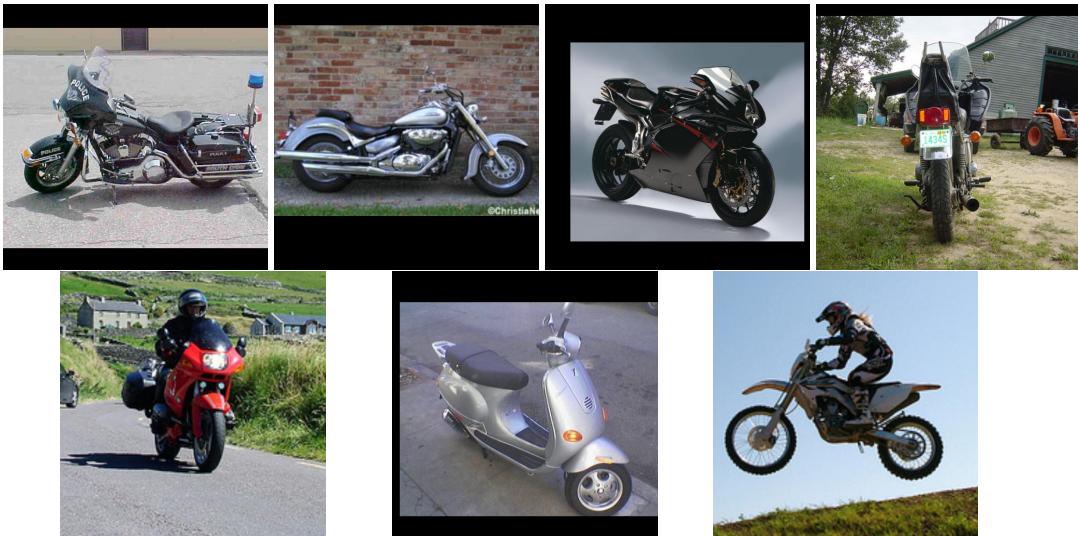

Figure 6: Anchor Images for Motorbike Category in PASCAL3D+ dataset.

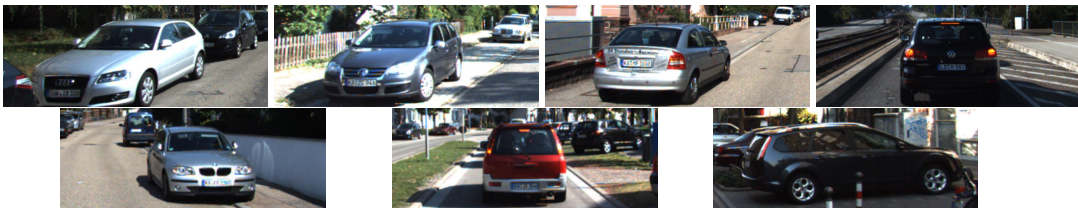

Figure 7: Anchor Images for KITTI dataset.
